# Supplementary material for: RNA-Seq Analysis of Spinal Cord Tissues from hPFN1G118V Transgenic Mouse Model of ALS at Pre-symptomatic and End-Stages of Disease
Source: PubMed Central journal article supplement (PMC6137178; doi:10.1038/s41598-018-31132-y), 2018-09-13
Supplement: 41598_2018_31132_MOESM1_ESM.pdf [file 41598_2018_31132_MOESM1_ESM.pdf]

## Supplementary Material

# RNA-Seq Analysis of Spinal Cord Tissues from hPFN1<sup>G118V</sup> Transgenic Mouse Model of ALS at Presymptomatic and End Stages of Disease

Caroline Barham<sup>1</sup>, Daniel Fil<sup>1,Ψ</sup>, Stephanie D. Byrum<sup>2</sup>, Yasir Rahmatallah<sup>5</sup>,  
Galina Glazko<sup>5</sup>, and Mahmoud Kiaei<sup>1,3,4,\*</sup>

<sup>1</sup>Department of Pharmacology and Toxicology, <sup>2</sup>Department of Biochemistry and Molecular Biology, <sup>3</sup>Department of Geriatrics, <sup>4</sup>Department of Neurology, <sup>5</sup>Department of Biomedical Informatics, University of Arkansas for Medical Sciences, Little Rock, AR, USA

## Legends for Supplementary Tables

**Supplementary Table S1. Cell-type composition genes.** List of cell-type-specific genes for astrocytes, microglia neurons, motor neurons, and oligodendrocytes (collected from D'Erchia et al.) that were used for cell-type composition analysis of spinal cord samples. We selected only genes with corresponding mouse orthologues showing  $\log_2(1+\text{FPKM}) > 0$  in all samples.

**Supplementary Table S2. Significantly differentially expressed genes from limma.** Four lists of significantly differentially expressed genes evaluated by limma from four comparisons: MY vs. MO, WO vs. MO, WY vs. WO, and WY vs. MY. Only genes with  $|\log_2\text{FC}| > 0.58$  ( $|\text{FC}| \geq 1.5$ ) and  $\text{FDR} \leq 0.05$  are included. Column descriptions: 'logFC' represents  $\log_2$ -fold change of the gene between the two groups being compared; 'AveExpr' gives the average  $\log_2(1+\text{FPKM})$  for the gene across the samples used in the comparison; 't' is moderated t-statistic; 'P.Value' is the associated P-value; 'adj.P.Val' is P-value adjusted for multiple testing by the Benjamini-Hochberg method, an estimation of the false discovery rate (FDR); 'B' is the B-statistic, which is the log-odds that the gene is differentially expressed.

**Supplementary Table S3. IPA canonical pathway analysis.** Lists of IPA pathways significantly enriched with differentially expressed genes from MY vs. MO and WO vs. MO comparisons. Pathways with  $-\log_{10}(P) \leq 1.3$  ( $P \geq 0.05$ ) have been excluded. Column descriptions: 'z-score' indicates the prediction of activation or inactivation of the pathway, in which  $z\text{-score} \geq 2$  is considered significantly activated,  $z\text{-score} \leq -2$  is considered significantly inactivated, and  $z\text{-score} = \text{NaN}$  means IPA could not calculate the z-score; 'ratio' indicates the ratio between the number of differentially expressed genes and the number of genes in the pathway.
